# Supplementary material for: Observation of others’ actions during limb immobilization prevents the subsequent decay of motor performance
Source: PubMed Central journal article supplement (PMC8617512; doi:10.1073/pnas.2025979118), 2021-11-15
Supplement: pnas.2025979118.sapp.pdf [file pnas.2025979118.sapp.pdf]

# PNAS

[www.pnas.org](http://www.pnas.org)

Supplementary Information for

Observation of others' actions during limb immobilization prevents the subsequent decay of motor performance

Doriana De Marco<sup>a,§,\*</sup>, Emilia Scalona<sup>a,§</sup>, Maria Chiara Bazzini<sup>a,b</sup>, Arturo Nuara<sup>a</sup>, Elisa Taglione<sup>c</sup>, Nicola Francesco Lopomo<sup>a,d</sup>, Giacomo Rizzolatti<sup>a,b,\*</sup>, Maddalena Fabbri-Destro<sup>a,°</sup>, Pietro Avanzini<sup>a,e,°</sup>

- a) Consiglio Nazionale delle Ricerche, Istituto di Neuroscienze, Parma, Italy
- b) Università degli Studi di Parma, Dipartimento di Medicina e Chirurgia, Italy
- c) INAIL, Centro di Riabilitazione Motoria di Volterra, Italy
- d) Università degli Studi di Brescia, Dipartimento di Ingegneria dell'Informazione, Italy
- e) Istituto Clinico Humanitas, Milano, Italy

§These authors contributed equally to the study.

° These authors contributed equally to the study.

Corresponding authors: Giacomo Rizzolatti and Doriana De Marco

Email: [giacomo.rizzolatti@unipr.it](mailto:giacomo.rizzolatti@unipr.it); [doriana.demarco@in.cnr.it](mailto:doriana.demarco@in.cnr.it);

**This PDF file includes:**

Figures S1

Tables S1 to S3

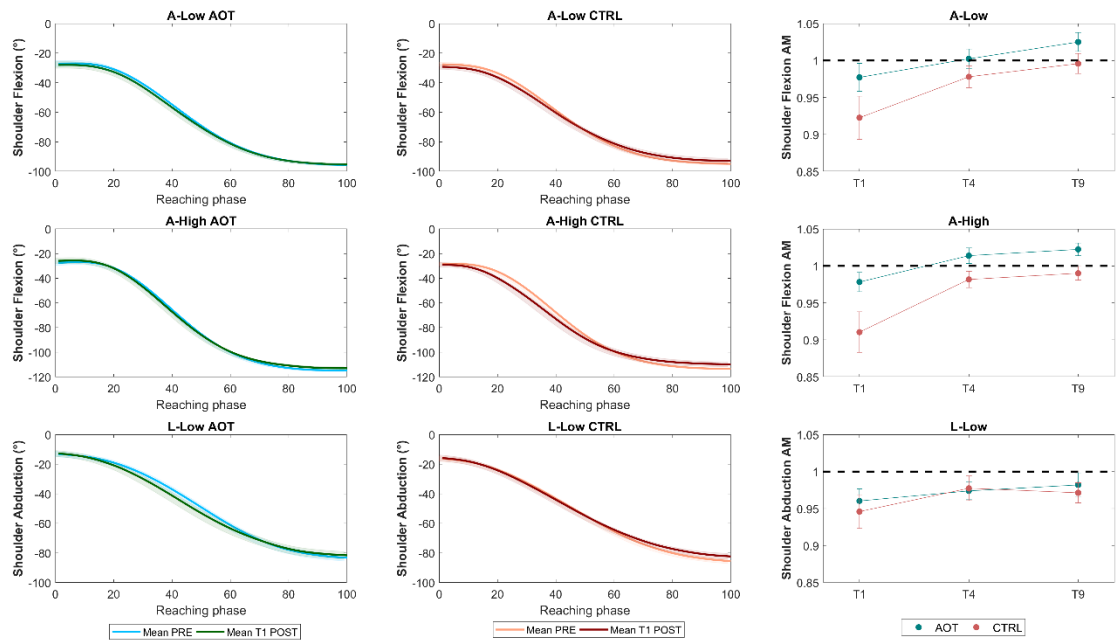

**Fig. S1.** Left and center columns: time courses of shoulder angles averaged across preimmobilization trials (light colors) for the AOT and CTRL groups (green and red, respectively) for the three movements (A-Low, A-High, and L-Low); time courses of mean shoulder angles acquired during the first trial of the postimmobilization phase (T1) are superimposed in corresponding dark color tones. Right column: means and standard errors of amplitude modulation (AM) evaluated at T1, T4, and T9 for the AOT and CTRL groups (green and red, respectively) and the three movements (A-Low, A-High, and L-Low).

| Mov    | Index    | AOT baseline  | CTRL baseline | <i>p</i> -value |
|--------|----------|---------------|---------------|-----------------|
| A-Low  | RD (s)   | 0.96 (0.11)   | 1.03 (0.14)   | 0.18            |
|        | VP (m/s) | 1.32 (0.21)   | 1.30 (0.21)   | 0.71            |
|        | MFr (%)  | 34.12 (20.31) | 38.91 (13.36) | 0.42            |
| A-High | RD (s)   | 1.04 (0.13)   | 1.05 (0.14)   | 0.79            |
|        | VP (m/s) | 1.60 (0.25)   | 1.57 (0.25)   | 0.78            |
|        | MFr (%)  | 37.39 (14.77) | 40.72 (12.00) | 0.44            |
| L-Low  | RD (s)   | 1.19 (0.26)   | 1.22 (0.20)   | 0.70            |
|        | VP (m/s) | 1.36 (0.23)   | 1.37 (0.23)   | 0.96            |
|        | MFr (%)  | 28.63 (24.89) | 27.30 (23.66) | 0.86            |

**Table S1.** Means and standard deviations of the preimmobilization scores (baseline) of reaching duration (RD), velocity peak (VP), and movement fractionation (MFr) for both groups (AOT and CTRL) and each movement (A-Low, A-High, and L-Low). The *p*-values are relative to unpaired *t*-tests between groups.

|                      |                   | ANOVA |        |          |                             | Bayesian Analysis |               |
|----------------------|-------------------|-------|--------|----------|-----------------------------|-------------------|---------------|
| Movement             | Index             | F     | p      | $\eta^2$ | post-hoc                    | BF <sub>10</sub>  | BF Robustness |
| Main Effect Time     | RD (s)            | 18.83 | <0.001 | 0.33     | T1 > T4<br>T1 > T9          | > 100             | Extreme       |
|                      | VP (m/s)          | 28.27 | <0.001 | 0.42     | T1 < T4<br>T1 < T9          | > 100             | Extreme       |
|                      | MFr (%)           | 10.41 | <0.001 | 0.21     | T1 > T4<br>T1 > T9          | > 100             | Extreme       |
|                      | AM <sub>Elb</sub> | 10.06 | <0.001 | 0.21     | T1 < T4<br>T1 < T9          | > 100             | Extreme       |
|                      | AM <sub>Sho</sub> | 9.05  | <0.001 | 0.19     | T1 < T4<br>T1 < T9          | > 100             | Extreme       |
| Main Effect Movement | RD (s)            | 1.78  | 0.175  | 0.04     |                             | 0.12              | No Evidence   |
|                      | VP (m/s)          | 2.36  | 0.101  | 0.06     |                             | 0.32              | No Evidence   |
|                      | MFr (%)           | 9.90  | <0.001 | 0.21     | L-Low>A-Low<br>L-Low>A-High | > 100             | Extreme       |
|                      | AM <sub>Elb</sub> | 8.69  | <0.001 | 0.22     | L-Low<A-Low<br>L-Low<A-High | 48.91             | Very Strong   |
|                      | AM <sub>Sho</sub> | 1.22  | 0.299  | 0.03     |                             | 0.11              | No Evidence   |
| Main Effect Group    | RD (s)            | 0.41  | 0.524  | 0.01     |                             | 0.27              | No Evidence   |
|                      | VP (m/s)          | 0.36  | 0.554  | 0.01     |                             | 0.19              | No Evidence   |
|                      | MFr (%)           | 7.55  | 0.009  | 0.16     |                             | 5.15              | Moderate      |
|                      | AM <sub>Elb</sub> | 10.98 | 0.002  | 0.22     |                             | 15.94             | Strong        |
|                      | AM <sub>Sho</sub> | 3.76  | 0.06   | 0.09     |                             | 1.01              | No Evidence   |

**Table S2.** ANOVA and Bayesian results for the main variables: reaching duration (RD), velocity peak (VP), movement fractionation (MFr), amplitude modulation of the elbow (AM<sub>Elb</sub>), and amplitude modulation of the shoulder (AM<sub>Sho</sub>).

|                      |                               | ANOVA |        |          |                             | Bayesian Analysis |               |
|----------------------|-------------------------------|-------|--------|----------|-----------------------------|-------------------|---------------|
| Movement             | Index                         | F     | p      | $\eta^2$ | post-hoc                    | BF <sub>01</sub>  | BF Robustness |
| Main Effect Time     | R <sup>2</sup> <sub>Elb</sub> | 2.79  | 0.067  | 0.07     |                             | 0.84              | No Evidence   |
|                      | AOff <sub>Elb</sub>           | 0.06  | 0.943  | 0.00     |                             | 30.25             | Very Strong   |
|                      | R <sup>2</sup> <sub>Sho</sub> | 7.30  | 0.001  | 0.16     | T1 < T4<br>T1 < T9          | 0.04              | No Evidence   |
|                      | AOff <sub>Sho</sub>           | 0.50  | 0.605  | 0.01     |                             | 12.72             | Strong        |
|                      | Trunk (mm)                    | 0.14  | 0.866  | 0.04     |                             | 29.39             | Strong        |
| Main Effect Movement | R <sup>2</sup> <sub>Elb</sub> | 10.36 | <0.001 | 0.21     | L-Low<A-Low<br>L-Low<A-High | < 0.01            | No Evidence   |
|                      | AOff <sub>Elb</sub>           | 5.25  | 0.007  | 0.12     | L-Low<A-Low<br>L-Low<A-High | 0.08              | No Evidence   |
|                      | R <sup>2</sup> <sub>Sho</sub> | 2.54  | 0.085  | 0.06     |                             | 5.77              | Moderate      |
|                      | AOff <sub>Sho</sub>           | 0.33  | 0.717  | 0.01     |                             | 22.93             | Strong        |
|                      | Trunk (mm)                    | 2.70  | 0.073  | 0.06     |                             | 0.25              | No Evidence   |
| Main Effect Group    | R <sup>2</sup> <sub>Elb</sub> | 0.32  | 0.573  | 0.01     |                             | 3.85              | Moderate      |
|                      | AOff <sub>Elb</sub>           | 0.55  | 0.461  | 0.01     |                             | 2.49              | Anecdotal     |
|                      | R <sup>2</sup> <sub>Sho</sub> | 1.01  | 0.321  | 0.03     |                             | 4.05              | Moderate      |
|                      | AOff <sub>Sho</sub>           | 1.49  | 0.229  | 0.03     |                             | 2.62              | Anecdotal     |
|                      | Trunk (mm)                    | 1.66  | 0.205  | 0.04     |                             | 0.51              | No Evidence   |

**Table S3.** ANOVA and Bayesian results for the control variables: R<sup>2</sup> of the elbow (R<sup>2</sup><sub>Elb</sub>), offset of the elbow (AOff<sub>Elb</sub>), R<sup>2</sup> of the shoulder (R<sup>2</sup><sub>Sho</sub>), offset of the shoulder (AOff<sub>Sho</sub>), and trunk compensation movement (Trunk).
